# Supplementary material for: Optimization of side chains in alkylthiothiophene-substituted benzo[1,2-b:4,5-b′]dithiophene-based photovoltaic polymers
Source: Royal Society of Chemistry journal article supplement (doi:10.1039/c5py00071h), 2015-01-01
Supplement: c5py00071h1.pdf [file c5py00071h1.pdf]

## Supporting Information

### Side Chain Effects in Alkylthioether Substituted Benzodithiophene (BDT-TS) Based Polymers and Applications in Polymer Solar Cells

Shaoqing Zhang,<sup>1, 2</sup> Mohammad Afsar Uddin,<sup>3</sup> Wenchao Zhao,<sup>2</sup> Long Ye,<sup>2</sup> Delong Liu,<sup>2</sup> Bei Yang,<sup>2</sup> Huifeng Yao,<sup>2</sup> Yong Cui,<sup>1, 2</sup> Han Young Woo,<sup>3\*</sup> Jianhui Hou<sup>1, 2\*</sup>

<sup>1</sup> University of Science and Technology Beijing, School of Chemistry and Biology Engineering, Beijing 100083, China.

<sup>2</sup> State Key Laboratory of Polymer Physics and Chemistry, Beijing National Laboratory for Molecular Sciences Institute of Chemistry, Chinese Academy of Sciences, Beijing 100190, China.

<sup>3</sup> Department of Cogno-Mechatronics Engineering, Pusan National University, Miryang 627-706, South Korea

E-mail: [hjhzlz@iccas.ac.cn](mailto:hjhzlz@iccas.ac.cn); [hywoo@pusan.ac.kr](mailto:hywoo@pusan.ac.kr)

Tel: +86-10-82615900

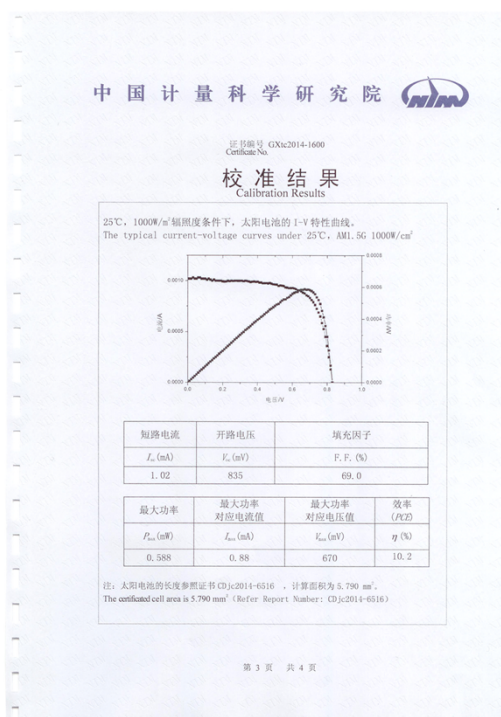

**Figure S1.** The PV certificate results by National Institute of Metrology, China (NIM)

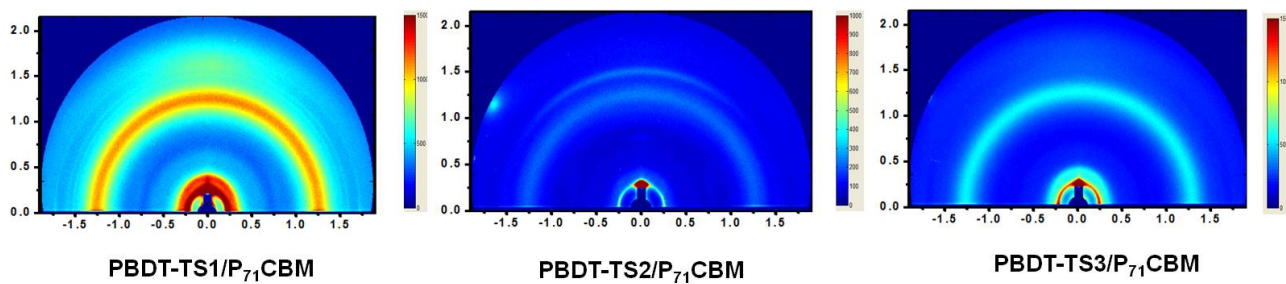

**Figure S2.** 2D patterns GI-WAXS data of the blend films of PBDT-TS1:PC<sub>71</sub>BM, PBDT-TS2:PC<sub>71</sub>BM and PBDT-TS3:PC<sub>71</sub>BM.

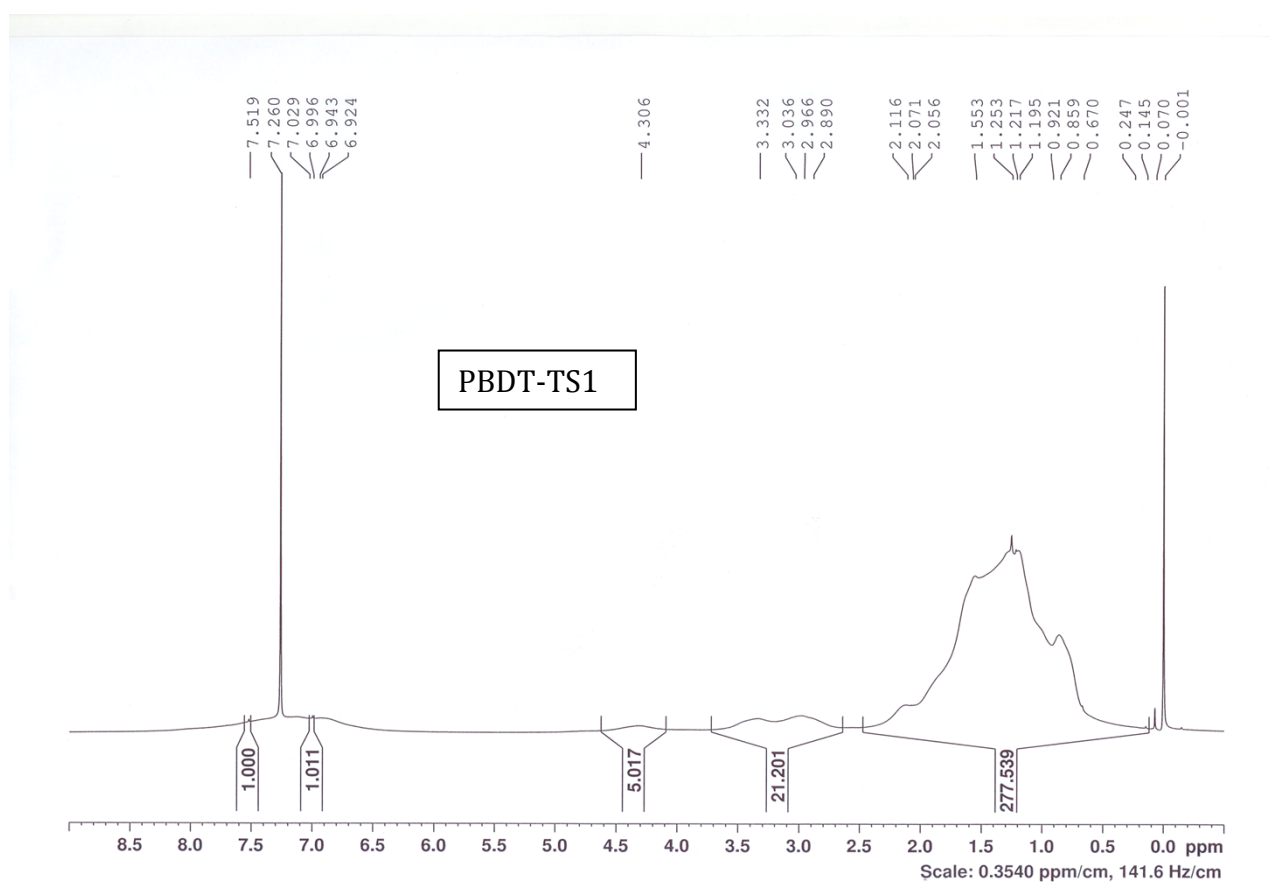

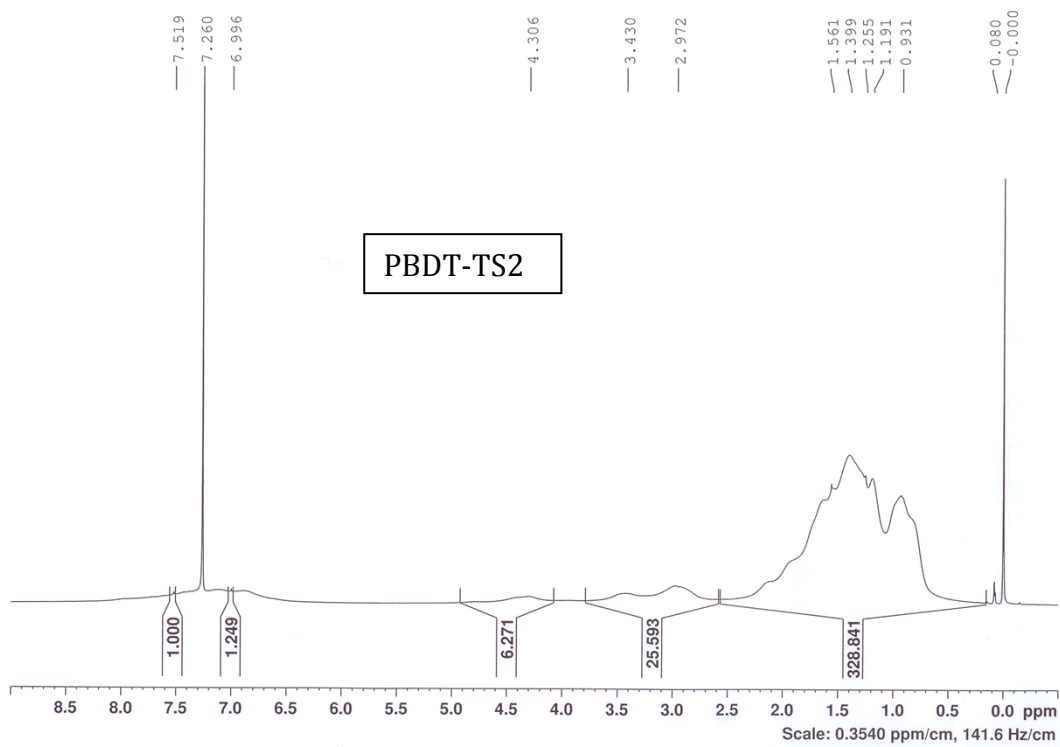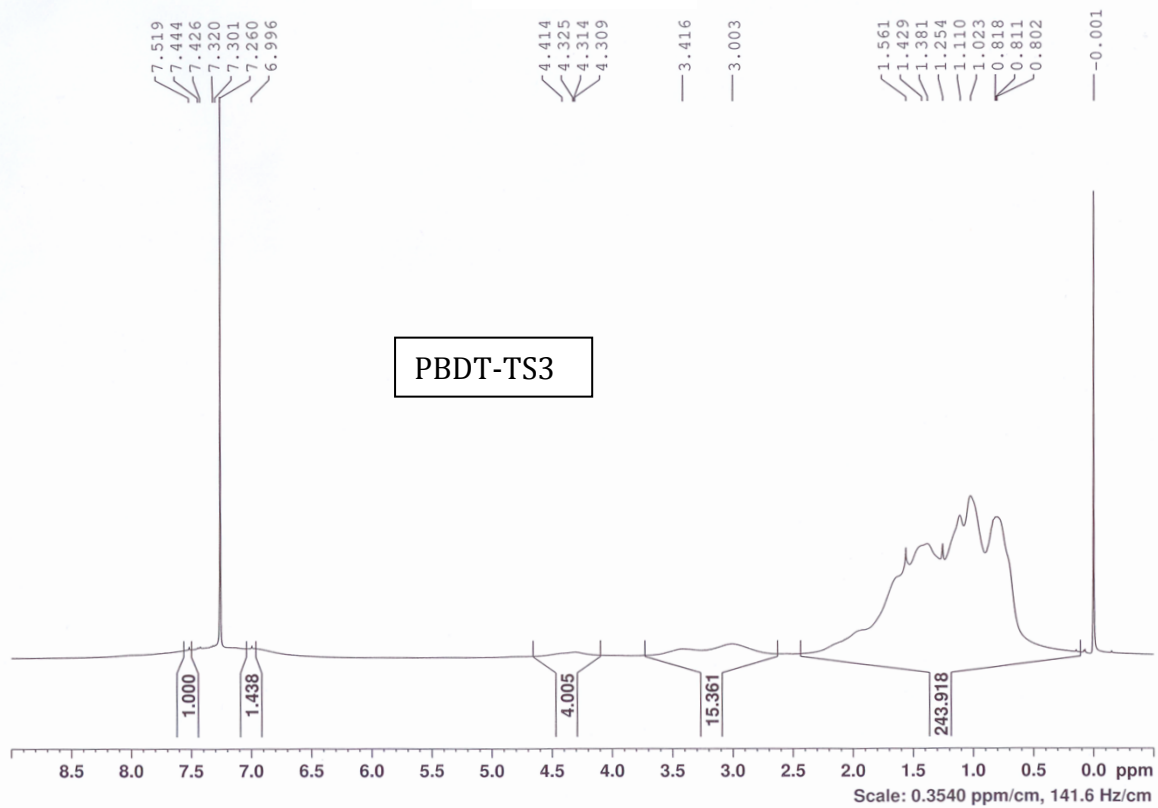

**Figure S3.** The  $^1\text{H}$  NMR data of the three polymers.
